# Supplementary material for: Microwave synthesis of carbon nanofibers – the influence of MW irradiation power, time, and the amount of catalyst
Source: Royal Society of Chemistry journal article supplement (doi:10.1039/c5ta06937h), 2015-01-01
Supplement: c5ta06937h1.pdf [file c5ta06937h1.pdf]

## Supplementary Information

### Microwave synthesis of carbon nanofibers – The influence of MW irradiation power, time, and amount of catalyst

Almut M. Schwenke,<sup>a,b</sup> Stephanie Hoeppener,<sup>a,b,\*</sup> Ulrich S. Schubert<sup>a,b</sup>

<sup>a</sup> Laboratory of Organic and Macromolecular Chemistry (IOMC), Friedrich Schiller University Jena, Humboldtstrasse 10, D-07743 Jena, Germany

<sup>b</sup> Jena Center for Soft Matter (JCSM), Friedrich Schiller University Jena, Philosophenweg 7, D-07743 Jena, Germany

E-mail: s.hoeppener@uni-jena.de

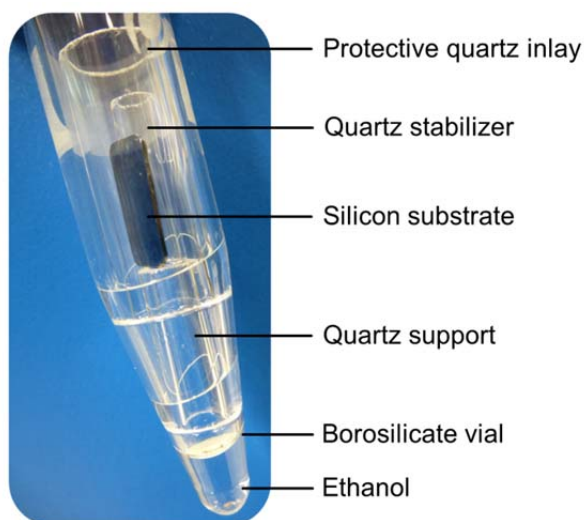

**Figure 1.** Photograph of the experimental set-up for the synthesis of carbon nanofibers by microwave heating.

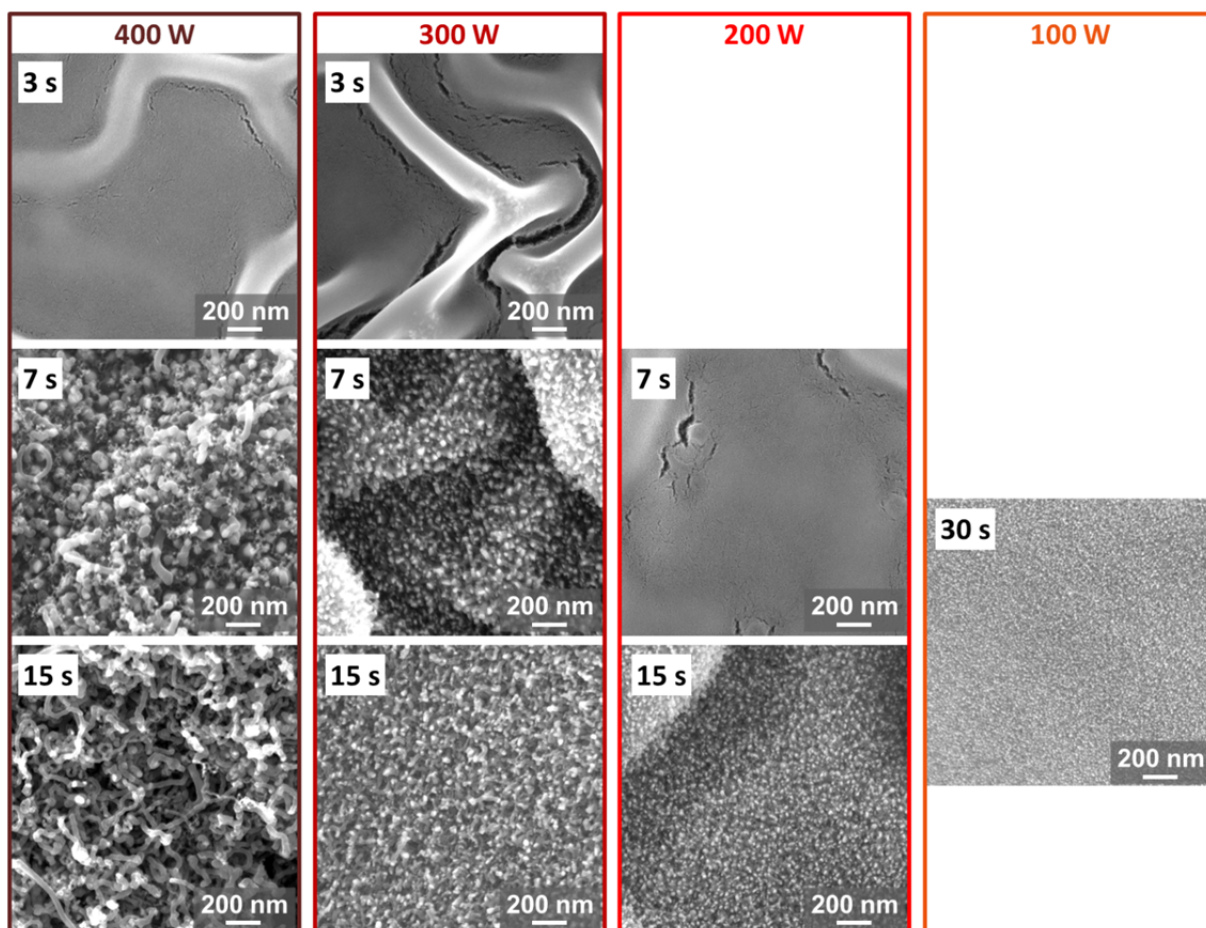

**Figure 2.** SEM images of the structures obtained after short microwave irradiation of 100 to 400 W before the CNF growth started. The 200 mM nickel acetate solution was applied as catalyst.

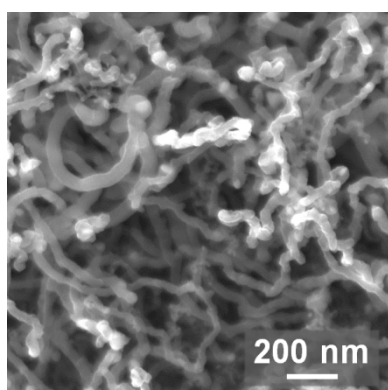

**Figure 3.** SEM image of CNFs prepared at 200 W irradiation power for 430 s using a 200 mM nickel acetate solution.

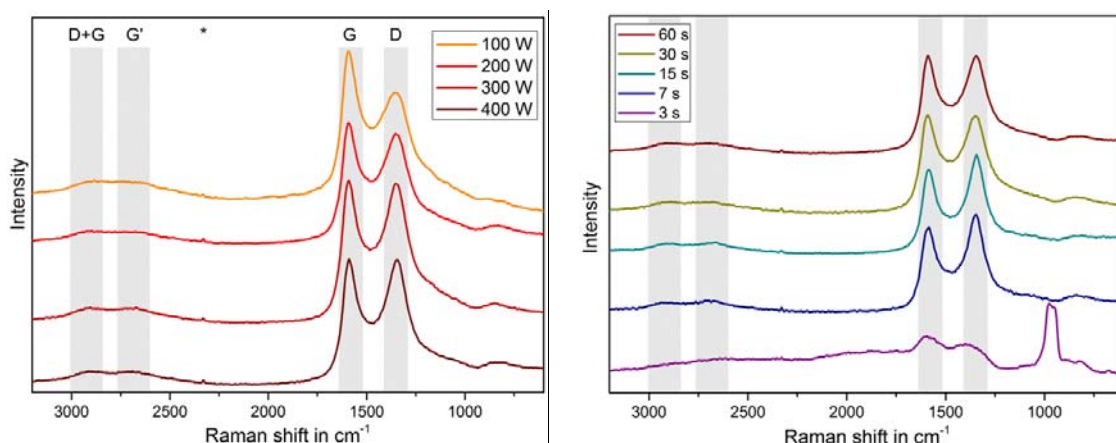

**Figure 4.** Left: Raman spectra of CNFs prepared with microwave irradiation for 60 s (400, 300 and 200 W) and 470 s (100 W), respectively. These conditions relate to the structures shown in Figure 1 (lower row). The typical peaks for carbon nanomaterials can be identified. The peak marked with \* can be assigned to the Raman mode of  $N_2$  gas present in the air surrounding the sample. Right: Raman spectra of CNFs prepared at 400 W with different irradiation times. The carbon peaks can be clearly identified after an irradiation time of 7 s.

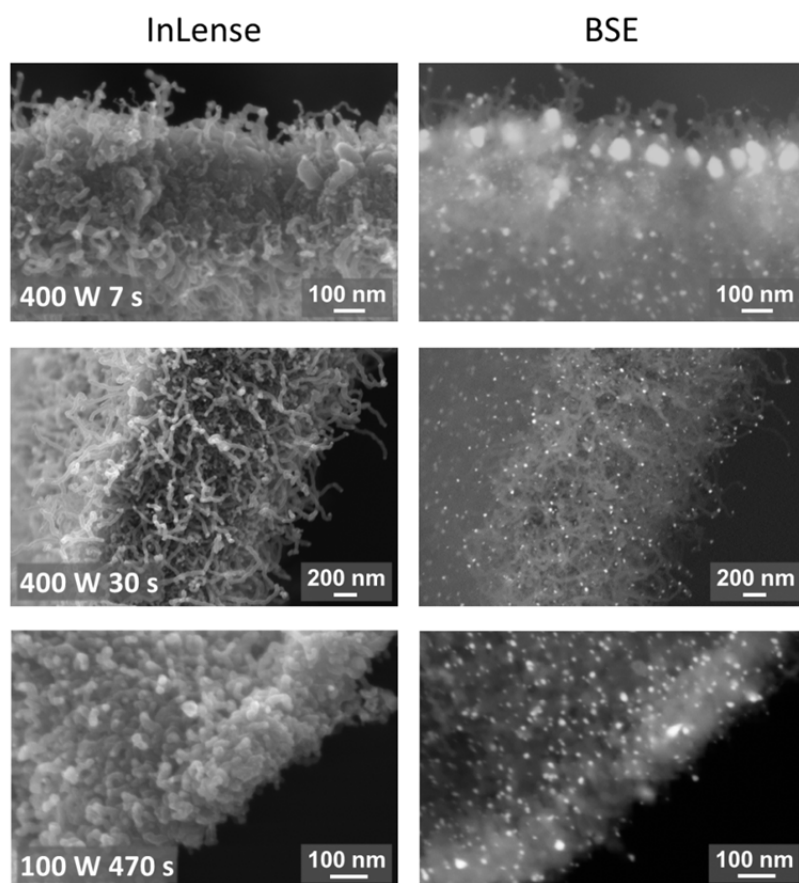

**Figure 5.** SEM images showing the topography (InLens detector) and the material contrast (back-scattered electron (BSE) detector) of CNFs prepared at different reaction conditions using a 200 mM nickel acetate solution. The brighter areas indicate material with higher atomic number, hence the nickel catalyst particles.

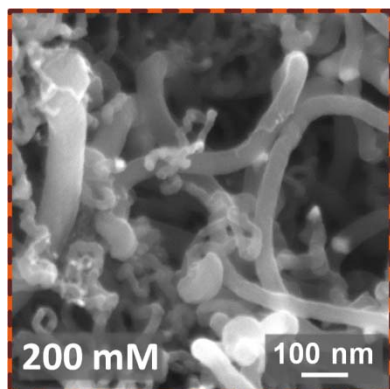

**Figure 6.** SEM image of CNFs prepared with two irradiation steps, 30 s at 100 W followed by 30 s at 400 W, using a 200 mM nickel acetate solution.

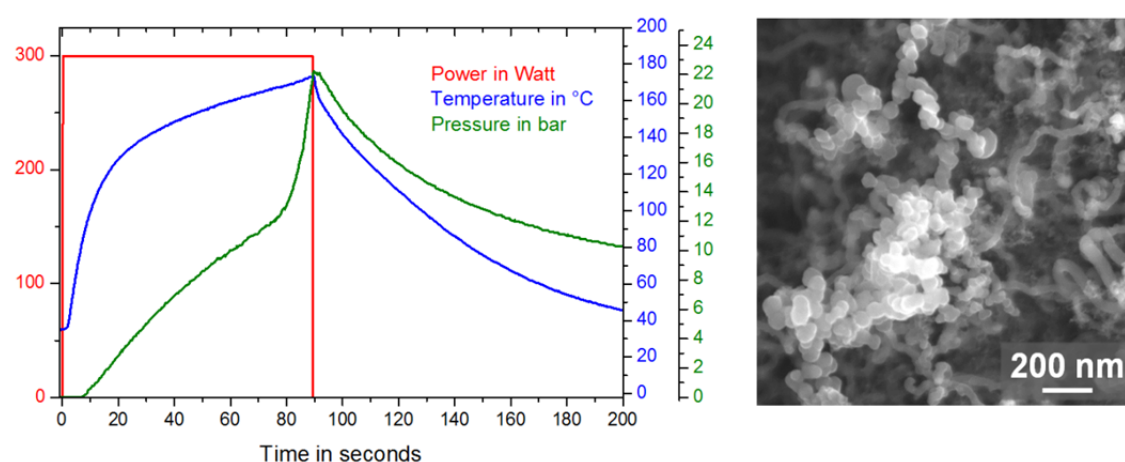

**Figure 7.** Microwave data and SEM image of CNFs prepared at 300 W irradiation power for 90 s using a 200 mM nickel acetate solution. After 75 s of irradiation a strong increase of pressure occurred, which is an indicator for the formation of a large amount of carbon material. SEM imaging revealed the formation of carbon nanoparticles supported on the earlier grown CNFs.

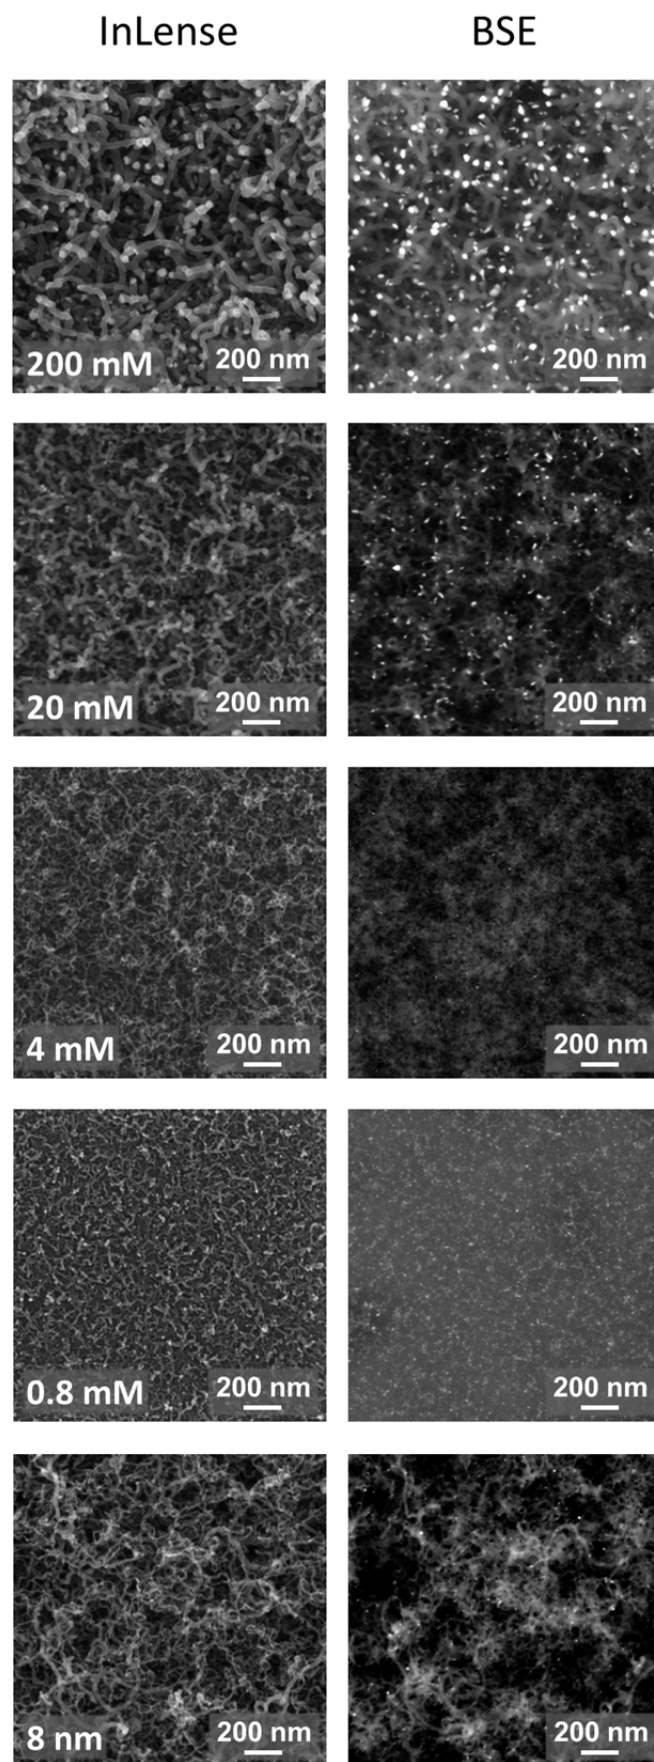

**Figure 8.** SEM images showing the topography (InLens detector) and the material contrast (back-scattered electron (BSE) detector) of CNFs prepared at 400 W using different amount and type of catalyst. The brighter areas indicate material with higher atomic number, hence the nickel catalyst particles.

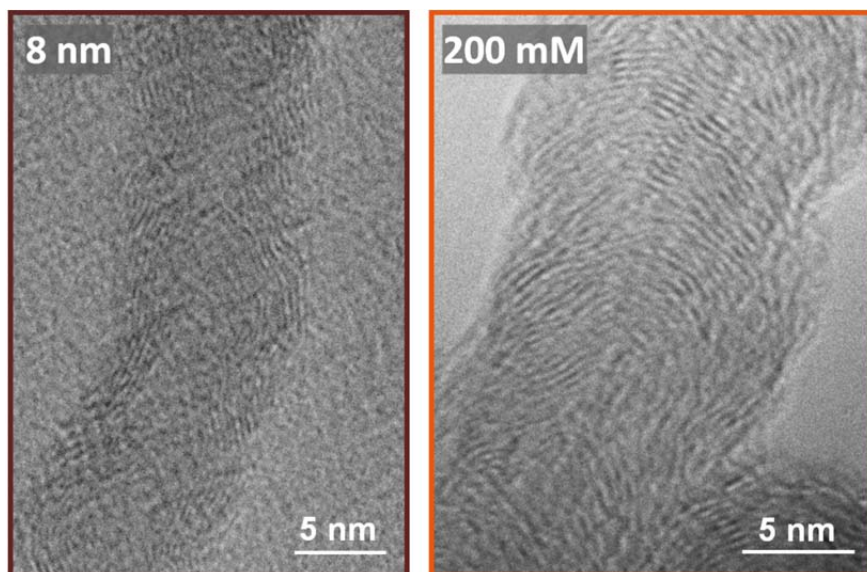

**Figure 9.** HR-TEM images of the structural morphology of carbon nanofibers prepared with a 8 nm nickel catalyst layer at 400 W microwave irradiation power for 15 s and a 200 mM catalyst solution at 100 W microwave irradiation power for 470 s, respectively.

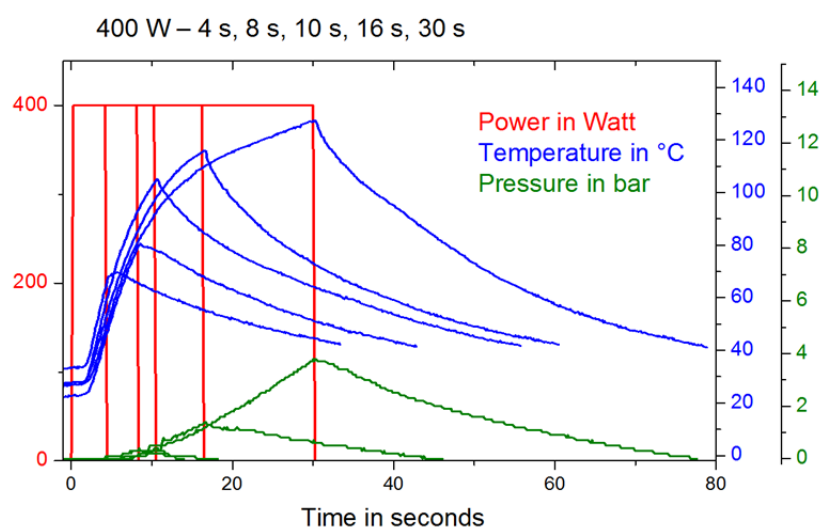

**Figure 10.** Power, temperature and pressure curves obtained during the synthesis of CNF at 400 W microwave irradiation power for 4 to 30 s using a 20 mM catalyst solution.

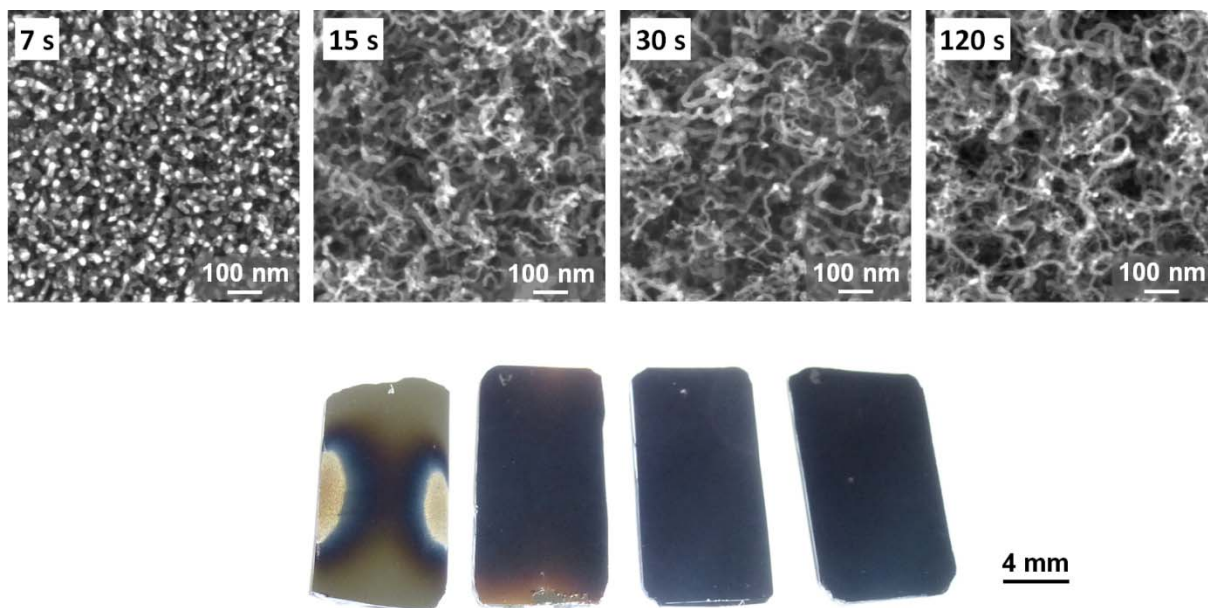

**Figure 11.** SEM images and photographs from CNF samples prepared utilizing a 8 nm thick nickel catalyst layer and microwave irradiation of 400 W for 7 to 120 s.

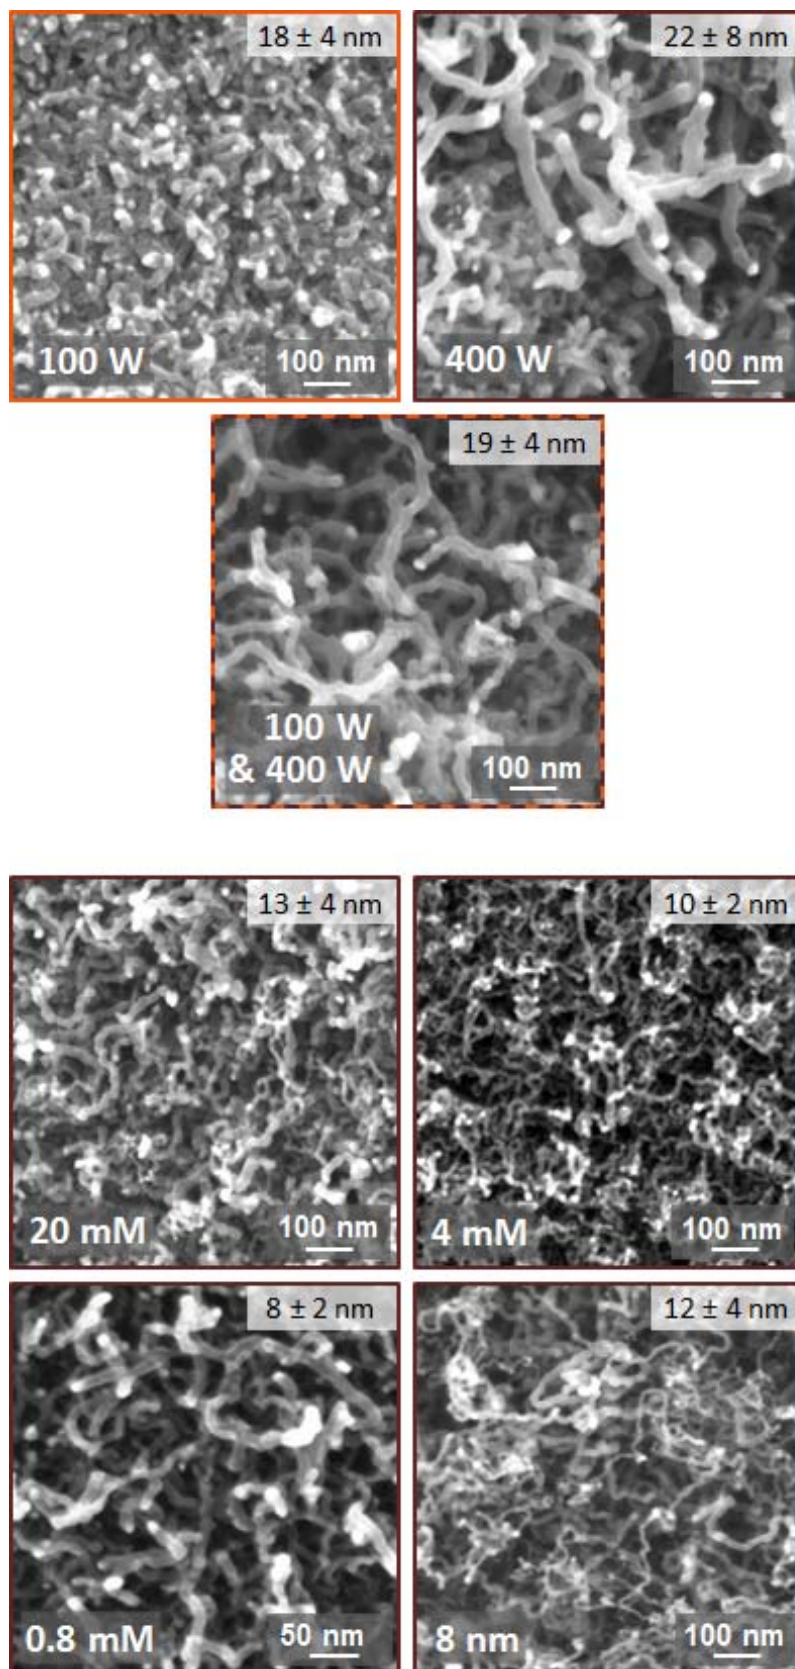

**Figure 12.** Examples of top-view SEM images used for the determination of the diameter distribution of carbon nanofiber coatings prepared at various conditions.
